# Supplementary material for: Associations between Childhood Parental Mental Health Difficulties and Depressive Symptoms in Late Adulthood: The Influence of Life-Course Socioeconomic, Health and Lifestyle Factors
Source: PLoS One. 2016 Dec 9;11(12):e0167703. doi: 10.1371/journal.pone.0167703 (PMC5147958; doi:10.1371/journal.pone.0167703)
Supplement: S2 Table — (XLSX) [file pone.0167703.s002.xlsx]

## Sheet: Sheet2
Excluding one country at the time
VARIABLES	OR	95% CI	OR	95% CI	OR	95% CI
Dependent variable:	Depression (EURO-D ≥ 4)
Parental mental health problems during childhood
No Sweden	1.781	(1.434 - 2.212)	1.584	(1.270 - 1.976)	1.485	(1.176 - 1.876)
No Denmark	1.884	(1.476 - 2.403)	1.663	(1.297 - 2.132)	1.587	(1.223 - 2.060)
No Germany	1.645	(1.309 - 2.066)	1.422	(1.127 - 1.796)	1.326	(1.036 - 1.697)
No Netherlands	1.856	(1.485 - 2.319)	1.6	(1.274 - 2.009)	1.49	(1.171 - 1.896)
No Belgium	1.824	(1.458 - 2.282)	1.605	(1.277 - 2.017)	1.519	(1.193 - 1.933)
No France	1.786	(1.441 - 2.214)	1.563	(1.255 - 1.946)	1.469	(1.165 - 1.852)
No Switzerland	1.764	(1.421 - 2.190)	1.544	(1.238 - 1.925)	1.447	(1.146 - 1.827)
No Austria	1.759	(1.421 - 2.178)	1.539	(1.238 - 1.914)	1.457	(1.159 - 1.833)
No Spain	1.721	(1.388 - 2.133)	1.508	(1.211 - 1.878)	1.412	(1.119 - 1.780)
No Italy	1.748	(1.412 - 2.164)	1.505	(1.209 - 1.872)	1.433	(1.138 - 1.803)
No Greece	1.74	(1.408 - 2.151)	1.519	(1.223 - 1.886)	1.425	(1.133 - 1.792)
No Poland	1.716	(1.387 - 2.122)	1.498	(1.205 - 1.861)	1.415	(1.126 - 1.780)
No Czech Republic	1.732	(1.398 - 2.145)	1.51	(1.213 - 1.879)	1.425	(1.131 - 1.796)
